# Supplementary material
Source: PubMed Central journal article supplement (PMC2844178)
Supplement: supp_M109.081877_jbc.M109.081877-1.pdf [file supp_M109.081877_jbc.M109.081877-1.pdf]

**Supplementary Figure S1. Relative abundance of ceramide species in the epidermis of newborn wild-type, *Cgi-58*<sup>-/-</sup>, and *Atgl*<sup>-/-</sup> mice.**

Epidermal lipids were extracted from newborn wild-type, *Cgi-58*<sup>-/-</sup>, and *Atgl*<sup>-/-</sup> mice. Free  $\omega$ -OH ceramides (**A**) and acylceramides (**B**) were analyzed by UPLC-MSMS. Covalently-bound  $\omega$ -OH ceramides (**C**) of the extracted epidermises were released by mild alkaline hydrolysis and analyzed by UPLC-MSMS. Peak areas of ceramide species were normalized to epidermal protein content. Data are means  $\pm$  S.D. (n=3-6) and representative for 3 independent experiments.

**Supplementary Figure S2. Relative abundance of the major phospholipid species in the epidermis of newborn wild-type, *Cgi-58*<sup>-/-</sup>, and *Atgl*<sup>-/-</sup> mice.**

Epidermal lipids were extracted from newborn wild-type, *Cgi-58*<sup>-/-</sup>, and *Atgl*<sup>-/-</sup> mice. Phosphatidylcholine (**A**) and phosphatidylethanolamine (**B**) were analyzed by UPLC-MSMS. Peak areas of phospholipid species were normalized to epidermal protein content. Data are means  $\pm$  S.D. (n=3-6) and representative for 3 independent experiments.

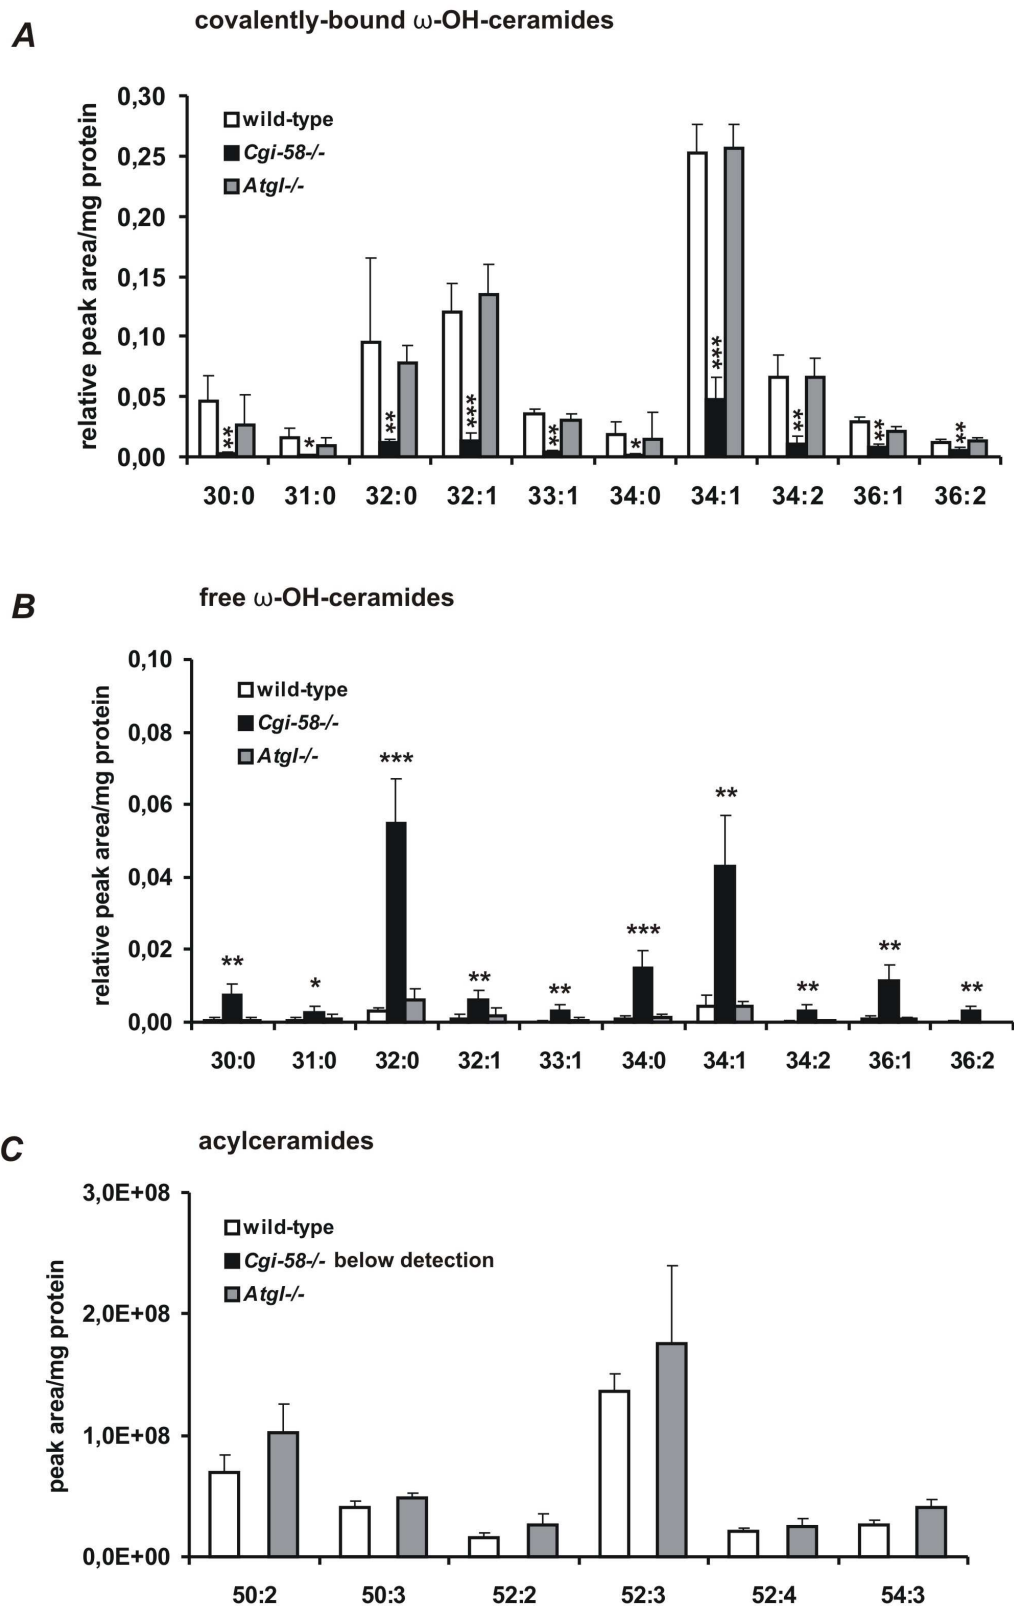

Supplementary Figure S1

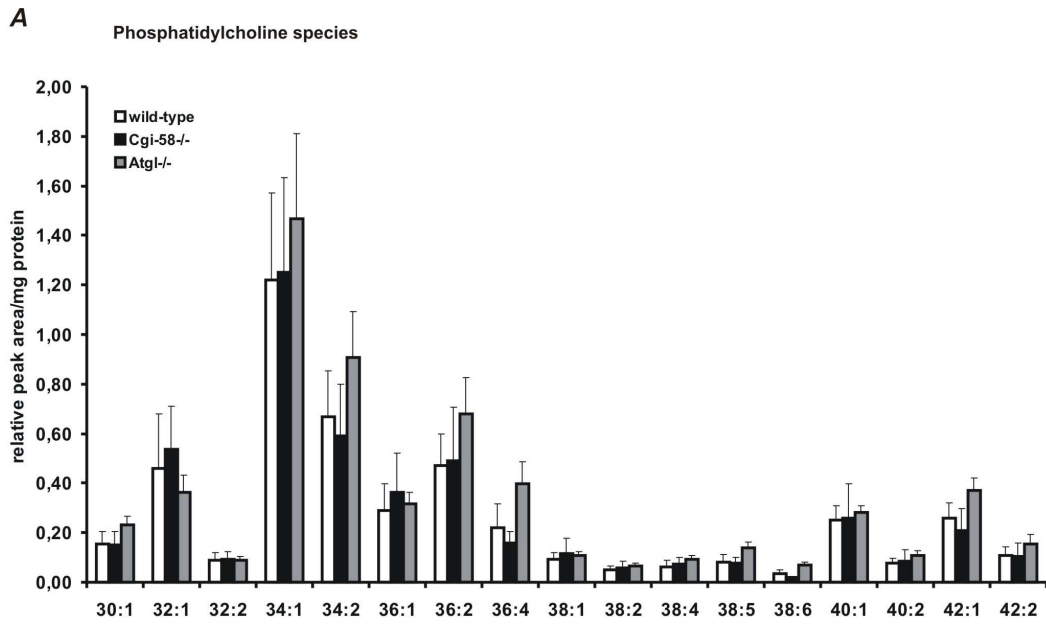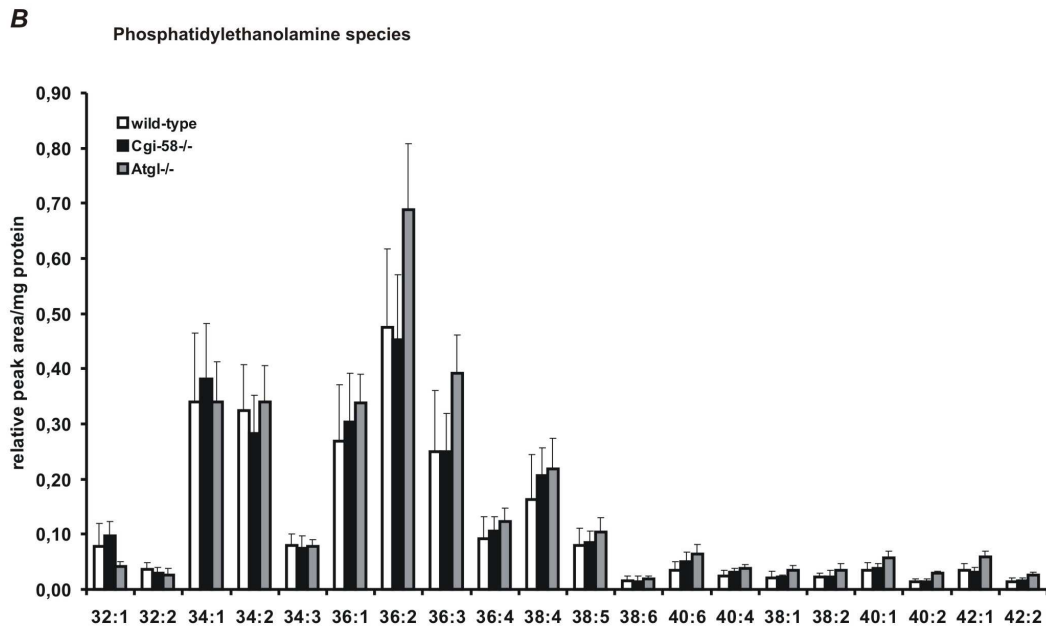

Supplementary Figure S2
